# 1 **Network-based metrics of ecological memory and** 2 **resilience in lake ecosystems**

3 David I. Armstrong M<sup>c</sup>Kay\*<sup>1,2,3</sup>, James G. Dyke<sup>1,4</sup>, John A. Dearing<sup>1</sup>,  
4 C. Patrick Doncaster<sup>5</sup>, Rong Wang<sup>6</sup>

5 <sup>1</sup> *Geography and Environmental Science, University of Southampton, Southampton, UK,*  
6 *SO17 1BJ (work started here)*

7 <sup>2</sup> *Stockholm Resilience Centre, Stockholm University, SE-10691 Stockholm, Sweden (current*  
8 *address DIAM)*

9 <sup>3</sup> *Bolin Centre for Climate Research, Stockholm University, SE-10691 Stockholm, Sweden*

10 <sup>4</sup> *Global Systems Institute, College of Life and Environmental Sciences, University of Exeter,*  
11 *Exeter, UK (current address JGD)*

12 <sup>5</sup> *School of Biological Sciences, University of Southampton, Southampton, UK, SO17 1BJ*

13 <sup>6</sup> *State Key Laboratory of Lake Science and Environment, Nanjing Institute of Geography and*  
14 *Limnology, Chinese Academy of Sciences, China, 210008*

15 \*[david.armstrongmckay@su.se](mailto:david.armstrongmckay@su.se)

16 **Paper in review at: Royal Society Biology Letters**

## 17 **Abstract**

18           Some ecosystems undergo abrupt transitions to a new regime after passing a tipping  
19 point in an exogenous stressor, for example lakes shifting from a clear to turbid ‘eutrophic’  
20 state in response to nutrient-enrichment. Metrics-based resilience indicators have been  
21 developed as early warning signals of these shifts but have not always been reliable.  
22 Alternative approaches focus on changes in the structure and composition of an ecosystem,  
23 which can require long-term food-web observations that are typically beyond the scope of  
24 monitoring. Here we prototype a network-based algorithm for estimating ecosystem  
25 resilience, which reconstructs past ecological networks solely from palaeoecological  
26 abundance data. Resilience is estimated using local stability analysis, and eco-net energy: a  
27 neural network-based proxy for ‘ecological memory’. We test the algorithm on modelled  
28 (PCLake+) and empirical (lake Erhai) data. The metrics identify increasing diatom  
29 community instability during eutrophication in both cases, with eco-net energy revealing  
30 complex eco-memory dynamics. The concept of ecological memory opens a new dimension  
31 for understanding ecosystem resilience and regime shifts; further work is required to fully  
32 explore its drivers and implications.

33

34 **Keywords:** Lake Eutrophication; Early Warning Signals; Resilience; Palaeoecology; Neural  
35 Networks

36

## 37 **1. Background**

38           The potential for stressed ecosystems to tip abruptly into a new regime has led to a  
39 proliferation of metrics attempting to quantify ecosystem resilience [1–10]. Lake  
40 eutrophication is a well-studied example of a regime shift, often with evidence of alternative  
41 stable states and hysteresis [11–13]. Eutrophication occurs when increasing nutrient loading  
42 triggers positive feedbacks, driving a rapid shift from clear to turbid conditions [14,15], with  
43 recovery to clear conditions often requiring nutrient levels reduced far below the original  
44 threshold [13]. Prior to tipping, the ecosystem experiences declining resilience, defined here  
45 as the weakening of negative relative to positive feedbacks resulting in greater sensitivity to  
46 small shocks [16]. Attempts to develop resilience indicators broadly fall into three  
47 approaches: time-series metrics, compositional analysis, and network-based.

48           Many resilience indicators test for ‘critical slowing down’: a slowing recovery rate  
49 from perturbations and increasing variability, which can be detected in various environmental  
50 time-series [4–10]. These time-series metrics have had inconsistent success, however, as  
51 early-warning signals (EWS) of tipping points in freshwater [17] and other ecosystems [18–  
52 21]. A key methodological issue is the need for prior knowledge of one response variable that  
53 captures the dynamics of the whole system. Other limitations include possible false positives  
54 or negatives (where EWS indicate an impending transition which never occurs, or is absent  
55 prior to a known transition), and sensitivity to subjective time-series analysis parameter  
56 choices [7,22,23]. These limitations are partially rectified by using multiple sensitivity-tested  
57 metrics as generic resilience indicators rather than as EWS of specific critical transitions  
58 [16,24]. Palaeorecords present additional problems, with variable temporal resolution from  
59 changing accumulation rates or compaction making robust time-series analysis challenging  
60 [25,26].

61           As an alternative to metric-based EWS, analysis of ecosystem composition seeks to  
62 detect changes in community functional dynamics without having to select or understand the

63 full trophic ecology of any one species. To this end Doncaster et al. [27] quantified the  
64 compositional disorder of diatoms and chironomids from sediment cores in three Chinese  
65 lakes, where low disorder signifies highly-nested sequential compositions. Several decades  
66 prior to a critical transition, the correlation of disorder with biodiversity becomes negative and  
67 strengthens towards the tipping point. Theory and simulations suggested that nutrient loading  
68 shifted competitive balance from ‘weedy’ (weakly competitive, fast-replicating) towards  
69 ‘keystone’ (strongly competitive, slow-replicating) species. This correlative approach avoids  
70 issues of variable temporal resolution, but the link with ecosystem resilience is indirect and  
71 the competition dynamics remain hypothetical. Another recent composition-based method  
72 identified negative skewness in nodal degree of diatoms as a response to increasing nutrient  
73 input into Chinese lake ecosystems [28], which is compatible with rising keystone dominance  
74 with exogenous stress.

75 Network-based approaches perform local stability analysis on reconstructions of the  
76 lake food-webs. Kuiper et al. [29] showed that food-web data in the form of material flux  
77 descriptions can be used to reconstruct the interaction strengths between different species,  
78 which correspond to the interaction coefficients of a Lotka-Volterra ecosystem model (Figure  
79 1a). This is equivalent to a dynamical system’s Jacobian matrix, which is considered stable if  
80 the real part of the Jacobian’s eigenvalues remain negative (representing net-negative  
81 feedbacks) [29–31]. Given food-web measurements, the food-web’s local stability can be  
82 estimated from the intraspecific interaction strengths, and is closely related to the Jacobian’s  
83 dominant eigenvalue ( $\lambda_d$ ) [29,32–34].  $\lambda_d$  increases with post-perturbation recovery times from  
84 weakened net-negative feedbacks, and so tracks ecosystem resilience. This approach enabled  
85 destabilising food-web reorganisations prior to eutrophication to be tracked in the PCLake  
86 model [29].

87 Although network-based methods depends less on temporal resolution than time-series  
88 analysis [29] and avoids reliance on a single variable, it requires gathering detailed food-web

89 data at regular intervals during eutrophication, a laborious [35] and often unmanageable task  
90 for real-world lakes. Nevertheless, many lakes have palaeoecological records of species  
91 abundances obtained from sediment cores. If past ecosystem interactions can be reconstructed  
92 from this data, it becomes possible to estimate past changes in ecosystem resilience. Here we  
93 prototype and test an algorithm in R [36] for reconstructing ecological networks (eco-nets)  
94 from palaeoecological data using network inference [37–40]. This technique for  
95 characterising interspecific interactions comes from microbial metagenomics, where it  
96 provides an alternative to the unreliable proxy of relative abundance correlations. Network  
97 inference instead uses multilinear regression to infer the interaction matrix of a discrete-time  
98 Lotka-Volterra ecosystem model from abundance data (Figure 1a), with nodes representing  
99 individual species or functional groups and edges their interactions, and is less dependent on  
100 regular temporal resolution [38].

101 We then explore ecosystem resilience using two different approaches. Firstly, we  
102 perform local stability analysis on the inferred interaction matrix with a rolling temporal  
103 window, in order to track changes in  $\lambda_d$ . We test this on two different datasets of  
104 eutrophication-induced regime shifts: output from a commonly-used lake ecosystem model  
105 (PCLake+) for a hypothetical lake on a whole-ecosystem level, and empirical community-  
106 level data from lake Erhai where a critical transition was observed in 2001. For comparison,  
107 we also calculate time-series metrics (TSMs: AR1, standard deviation (SD), skewness, and  
108 kurtosis), biodiversity, and for empirical data sequential disorder-biodiversity correlation.

109 Secondly, we develop a novel neural network-based method of resilience analysis.  
110 Analyses of Lotka-Volterra systems demonstrate how an ecosystem can retain a distributed  
111 ‘memory’ of past states as a result of a process akin to unsupervised Hebbian learning in a  
112 neural network [41,42]. In Hopfield Networks, frequent correlations between neurones  
113 (nodes) lead to an increase in their connection strength (edges) – a process described  
114 colloquially as “*neurons that fire together, wire together*” [43–46]. Over time this allows the

115 emergence of distributive associative memory of training input that can be recovered when  
116 given degraded input. Power et al. [41] proposed that eco-nets experience similar dynamics,  
117 with species (nodes) that frequently co-occur developing stronger interactions (edges),  
118 allowing emergence of a distributed associative “ecological memory” (eco-memory) of past  
119 environmental forcing (training input) that acts as a stable attractor (Figure 1b). Although  
120 memory strength has no direct metric, one can calculate its energy, which is minimised at  
121 metastable points. We estimate eco-net energy,  $E_N$ , by treating the interaction matrix  
122 reconstructed by our network-inference algorithm as the weight matrix [41] of a continuous  
123 Hopfield Network [43–46]. We expect low  $E_N$  for eco-nets that have ‘learnt’ from stable  
124 environmental conditions, and higher  $E_N$  when destabilisation shifts the eco-net away from its  
125 learned state. To test these expectations, we calculate  $E_N$  for both test-cases and compare to  
126 other resilience metrics. Detailed methods and scripts are available in the Supplementary  
127 Material.

## 128 **2. Results and Discussion**

### 129 *2.1. PCLake+*

130 We first apply the algorithm to output from a default setup of PCLake+ [47], an  
131 extension of the widely-used PCLake model of lake eutrophication, as a test-bed with well-  
132 known dynamics and drivers for generating realistic artificial data (with 14 functional groups  
133 representing the whole ecosystem, and phosphorus input increased along its nonlinear but  
134 non-hysteretic load-response curve to induce eutrophication- see Supplementary Material).  
135 The impact of nutrient enrichment is clearly visible in lake conditions, biodiversity, local  
136 stability ( $\lambda_d$ ), and eco-net energy ( $E_N$ ) as three distinct phases (Figure 2a-d, left). In phase 1,  
137  $\lambda_d$  increases shortly after input begins, in conjunction with declining  $E_N$  interrupted by a  
138 temporary peak at ~50-55 years ago (ya). However, following a plateau in both  $E_N$  and  $\lambda_d$  in  
139 phase 2,  $\lambda_d$  re-stabilises after a second peak (~35 ya) and  $E_N$  strongly decreases.  $E_N$  begins to

140 recover following the transition, while  $\lambda_d$  remains moderately high relative to pre-  
141 eutrophication levels. This pattern indicates complex eco-memory dynamics starting decades  
142 before the transition, with destabilisation away from memorised conditions (increasing  $\lambda_d$ , i.e.  
143 weakened net-negative feedbacks) accompanied and followed by a multi-phase “relearning”  
144 process (decreasing  $E_N$ ) as the eco-net adapts and restructures (increasing biodiversity) in  
145 response to new conditions. Increasing the accumulation rate does not alter the overall signal  
146 but reduces the resolution of deeper features (Supplementary Figure S1), indicating this  
147 methodology is not overly sensitive to temporal resolution.

## 148 2.2. *Lake Erhai*

149 Lake Erhai in south-western China has undergone eutrophication after decades of  
150 nutrient-enrichment, similar to our PCLake+ scenario. Data consist of relative diatom  
151 abundances sampled at regular radioisotope-dated intervals down sediment cores [27,48]. We  
152 focus on diatoms as they are well-preserved and belong to the same trophic level, but as they  
153 form only one functional group this means that unlike PCLake+ the whole ecosystem is not  
154 directly analysed. However, we posit that the community-level diatom  $\lambda_d$  acts as a proxy for  
155 whole-ecosystem resilience, as diatoms play a key role in the trophic loops involved in  
156 eutrophication [29] and are ecologically sensitive to water quality [49,50].

157 Although real-world data exhibits more complexity than model results, we can observe  
158 similar phases of activity to PCLake+ (Figure 2a-d, right). Phase 1 begins with nutrient-  
159 enrichment starting ~60-50 ya [48]. This is reflected by a shift to negative disorder-  
160 biodiversity correlation indicative of destabilisation, declining  $E_N$ , and culminates with a  $\lambda_d$   
161 peak. In phase 2 both  $\lambda_d$  and  $E_N$  plateau prior to the observed transition at ~8 ya, after which  
162  $E_N$  recovers,  $\lambda_d$  slightly drops, biodiversity sharply drops, and disorder-biodiversity  
163 correlation recovers. These patterns are broadly similar to the PCLake+ results, with phase 1  
164 marked by declining  $E_N$  and increasing  $\lambda_d$ , suggesting the eco-net destabilising and relearning

165 decades before the transition, and a recovery in  $E_N$  and stable  $\lambda_d$  post-transition. This  
166 similarity suggests diatoms can act as a community-level proxy for the whole lake ecosystem.  
167 However, the  $\lambda_d$  and  $E_N$  trends are not as clear during phase 1 as for PCLake+, suggesting that  
168 the data are not sufficiently resolved to fully capture this phase (unlike disorder-biodiversity  
169 correlation). There is also no post-transition  $E_N$  decline in lake Erhai, which may result from  
170 slower forcing (Supplementary Figure S2) or has yet to be observed. Biodiversity increases  
171 during destabilisation in both cases, but only during phase 2 in lake Erhai.

### 172 2.3. *Time-series metrics comparison*

173 TSM are shown for comparison as a legacy method. As a consistently sampled model  
174 lake with constant temporal resolution, PCLake+ provides idealised conditions for observing  
175 TSM during eutrophication (Figure 2e). During phase 1 AR1, skewness, and kurtosis rapidly  
176 peak and SD begins to steadily increase, whilst in phase 2 all metrics apart from SD decline.  
177 Lake Erhai shows only early peaks in skewness and kurtosis at ~92-75 ya before phase 1,  
178 which may represent an unknown precursor event. Following this, SD steadily increases while  
179 kurtosis decreases, AR1 and skewness slightly increase during phase 1, and in phase 2 AR1  
180 stabilises while skewness declines. Both examples suggest SD consistently increases during  
181 destabilisation, but variable temporal resolution obscures this in real-world data  
182 (Supplementary Figure S1). However, due to the methodological limitations described earlier,  
183 TSM are not considered robust for lake Erhai without further sensitivity and significance  
184 testing.

## 185 3. **Further Development**

186 Several methodological limitations can be improved with future development. The  
187 algorithm works best with long, minimally-sparse datasets that resolve equilibrium population  
188 dynamics, but many palaeorecords do not meet these requirements. Further development will  
189 improve the algorithm's capacity to analyse short or sparse datasets using innovative



190 techniques from metagenomic network inference [38]. We also assume these ecosystems fit a  
191 generalised Lotka-Volterra model, in which all abundance changes are caused by linear  
192 pairwise interspecific interactions and other processes simplified into a broad noise term.  
193 However, nonlinear interactions are expected in some ecosystems [37,51–55] and potentially  
194 allow a better representation of multiple alternative stable states [56,57], but are harder to  
195 parameterise. Future work will assess the feasibility of allowing nonlinear functional  
196 responses. The assumed model includes only biotic elements, with life-environment  
197 interactions implicit. Incorporating life-environment feedbacks explicitly would allow more  
198 realistic feedback loops critical to resilience to emerge (such as anoxia-driven phosphorus  
199 release from sediment), but the eco-net cannot simply be extended to include abiotic elements  
200 as the environment is assumed to be its training input. Possible solutions include neural  
201 networks that allow training input that is dynamic (e.g. continuous-time recurrent neural  
202 networks) and interacts with the eco-net (e.g. multi-layer or adversarial networks).

#### 203 **4. Conclusions**

204 With refinement, our findings suggest that network-based methods can allow changes  
205 in past ecosystem resilience to be reconstructed from palaeoecological abundance datasets  
206 from various settings, and are less sensitive to data quality than time-series metrics.  
207 “Ecological memory” has only been applied to a simplified ecosystem model before now  
208 [41,42], but the development here of eco-net energy allows us to explore eco-memory in more  
209 realistic models and empirical data for the first time. Eco-memory opens a new dimension for  
210 understanding ecosystem resilience, with the formation of eco-memory potentially increasing  
211 resilience by allowing past stable eco-network states to be recovered after disruptions. Further  
212 work is required to fully understand the drivers and implications of eco-memory dynamics,  
213 and to disentangle the effects of eco-memory from other drivers of ecosystem resilience.

214 **Acknowledgements**

215 This work was supported by an EPSRC/ReCoVER Pilot Study Project Award (RFFLP021).

216 Erhai data was provided by Rong Wang and the Nanjing Institute of Geography and

217 Limnology. We thank Pete Langdon for comments on preliminary results, and Annette

218 Janssen for advice on using PCLake+.

219 **Figures**

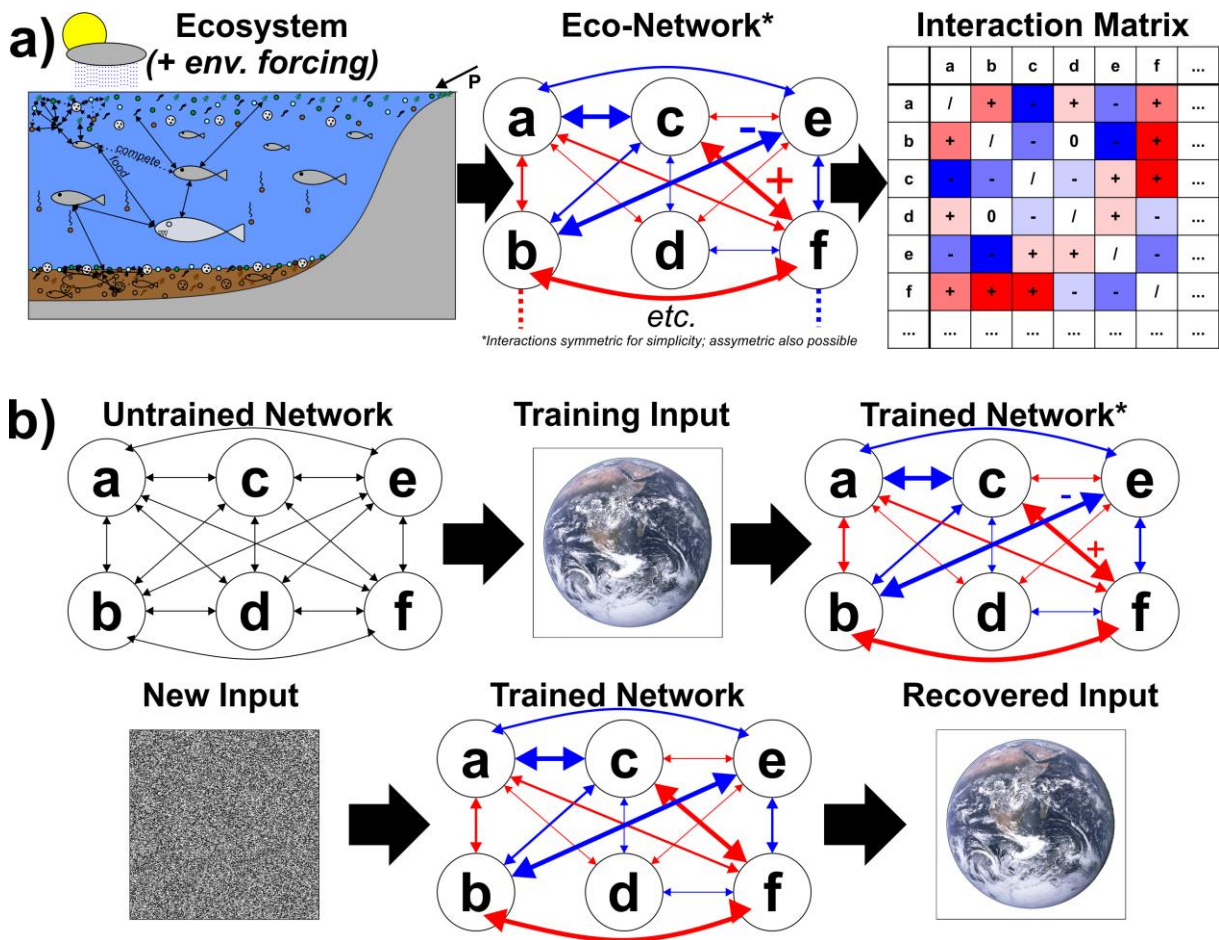

220

**Figure 1:** Schematics illustrating: (a) how ecosystem interactions (left) are represented as an eco-network (middle –lettered nodes represent individual species or functional groups, and edges their interactions), the structure of which forms an interaction matrix (right) suitable for resilience analysis (N.B. only symmetric interactions are shown; asymmetric interactions are common); and b) how networks can be trained using input (i.e. exogenous drivers; the Earth representing environmental forcing) which can be recovered when given new input (i.e. new drivers; white noise representing random forcing).

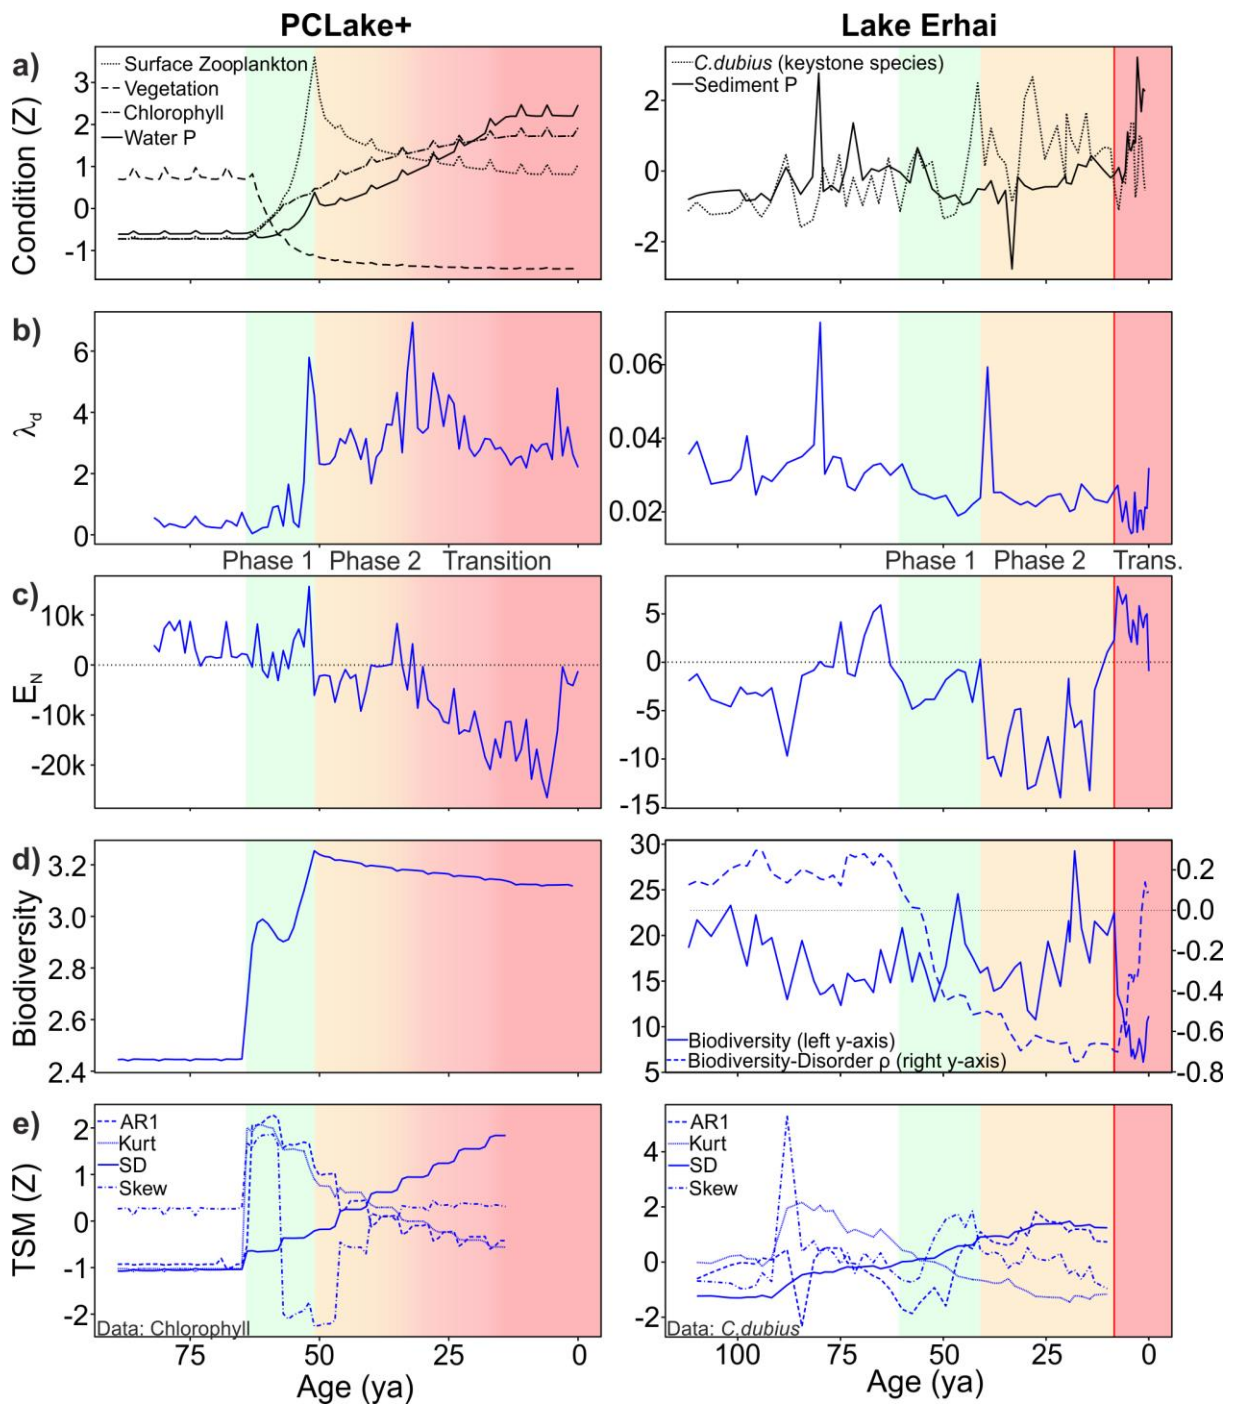

221

**Figure 2:** Results for PCLake+ (left) and lake Erhai (right), showing: (a) lake conditions (normalised concentrations/abundances – vegetation-zooplankton shift and increased chlorophyll in PCLake+ and increased keystone abundance in Erhai indicates eutrophication), (b) local instability  $\lambda_d$ , (c) eco-net energy  $E_N$ , (d) biodiversity (inverse Simpson index) and (Erhai only) disorder-biodiversity correlation [27], and (e) normalised time-series metrics (TSM; for comparison only). Interpreted transition phases (1=green box, initial destabilisation; 2=orange, pre-transition) and observed regime shifts (red box; gradient indicates smooth non-hysteretic transition, vertical line indicates critical transition) are marked.

## 222 References

- 223 1. Scheffer M *et al.* 2009 Early-warning signals for critical transitions. *Nature* **461**, 53–9.  
224 (doi:10.1038/nature08227)
- 225 2. Dakos V, Carpenter SR, van Nes EH, Scheffer M. 2015 Resilience indicators: prospects  
226 and limitations for early warnings of regime shifts. *Philos. Trans. R. Soc. B Biol. Sci.*  
227 **370**, 20130263–20130263. (doi:10.1098/rstb.2013.0263)
- 228 3. Lenton TM. 2013 Environmental Tipping Points. *Annu. Rev. Environ. Resour.* **38**, 1–29.  
229 (doi:10.1146/annurev-environ-102511-084654)
- 230 4. Kéfi S, Dakos V, Scheffer M, Van Nes EH, Rietkerk M. 2013 Early warning signals  
231 also precede non-catastrophic transitions. *Oikos* **122**, 641–648. (doi:10.1111/j.1600-  
232 0706.2012.20838.x)
- 233 5. Scheffer M *et al.* 2012 Anticipating critical transitions. *Science* **338**, 344–8.  
234 (doi:10.1126/science.1225244)
- 235 6. Dakos V *et al.* 2012 Methods for Detecting Early Warnings of Critical Transitions in  
236 Time Series Illustrated Using Simulated Ecological Data. *PLoS One* **7**, e41010.  
237 (doi:10.1371/journal.pone.0041010)
- 238 7. Lenton TM. 2011 Early warning of climate tipping points. *Nat. Clim. Chang.* **1**, 201–  
239 209. (doi:10.1038/nclimate1143)
- 240 8. Dakos V, Scheffer M, van Nes EH, Brovkin V, Petoukhov V, Held H. 2008 Slowing  
241 down as an early warning signal for abrupt climate change. *Proc. Natl. Acad. Sci. U. S.*  
242 *A.* **105**, 14308–12. (doi:10.1073/pnas.0802430105)
- 243 9. Carpenter SR, Brock WA. 2006 Rising variance: a leading indicator of ecological  
244 transition. *Ecol. Lett.* **9**, 311–318. (doi:10.1111/j.1461-0248.2005.00877.x)
- 245 10. Lenton TM, Livina VN, Dakos V, Scheffer M. 2012 Climate bifurcation during the last  
246 deglaciation? *Clim. Past* **8**, 1127–1139. (doi:10.5194/cp-8-1127-2012)
- 247 11. Scheffer M, Van Nes EH. 2007 Shallow lakes theory revisited: Various alternative  
248 regimes driven by climate, nutrients, depth and lake size. *Hydrobiologia* **584**, 455–466.  
249 (doi:10.1007/s10750-007-0616-7)
- 250 12. Scheffer M, Hosper S, Meijer M, Moss B, Jeppesen E. 1993 Alternative equilibria in  
251 shallow lakes. *Trends Ecol. Evol.* **8**, 275–279.
- 252 13. Scheffer M, Carpenter SR. 2003 Catastrophic regime shifts in ecosystems: Linking  
253 theory to observation. *Trends Ecol. Evol.* **18**, 648–656. (doi:10.1016/j.tree.2003.09.002)
- 254 14. Carpenter SR, Ludwig D, Brock WA. 1999 Management of Eutrophication for Lakes  
255 Subject To Potentially Irreversible Change. *Ecol. Appl.* **9**, 751–771. (doi:10.1890/1051-  
256 0761(1999)009[0751:MOEFLS]2.0.CO;2)
- 257 15. Carpenter SR. 2005 Eutrophication of aquatic ecosystems: Bistability and soil  
258 phosphorus. *Proc. Natl. Acad. Sci.* **102**, 10002–10005. (doi:10.1073/pnas.0503959102)

- 259 16. Armstrong McKay DI, Lenton TM. 2018 Reduced carbon cycle resilience across the  
260 Palaeocene–Eocene Thermal Maximum. *Clim. Past* **14**, 1515–1527. (doi:10.5194/cp-  
261 14-1515-2018)
- 262 17. Gsell AS *et al.* 2016 Evaluating early-warning indicators of critical transitions in  
263 natural aquatic ecosystems. *Proc. Natl. Acad. Sci.* **113**, E8089–E8095.  
264 (doi:10.1073/pnas.1608242113)
- 265 18. Bestelmeyer BT *et al.* 2011 Analysis of abrupt transitions in ecological systems.  
266 *Ecosphere* **2**, art129. (doi:10.1890/ES11-00216.1)
- 267 19. Burthe SJ *et al.* 2016 Do early warning indicators consistently predict nonlinear change  
268 in long-term ecological data? *J. Appl. Ecol.* **53**, 666–676. (doi:10.1111/1365-  
269 2664.12519)
- 270 20. Hastings A, Wysham DB. 2010 Regime shifts in ecological systems can occur with no  
271 warning. *Ecol. Lett.* **13**, 464–472. (doi:10.1111/j.1461-0248.2010.01439.x)
- 272 21. Litzow MA, Hunsicker ME. 2016 Early warning signals, nonlinearity, and signs of  
273 hysteresis in real ecosystems. *Ecosphere* **7**. (doi:10.1002/ecs2.1614)
- 274 22. Boettiger C, Ross N, Hastings A. 2013 Early warning signals: The charted and  
275 uncharted territories. *Theor. Ecol.* **6**, 255–264. (doi:10.1007/s12080-013-0192-6)
- 276 23. Boettiger C, Hastings A. 2012 Early warning signals and the prosecutor’s fallacy. *Proc.*  
277 *Biol. Sci.* **279**, 4734–9. (doi:10.1098/rspb.2012.2085)
- 278 24. Dakos V, Carpenter SR, van Nes EH, Scheffer M. 2015 Resilience indicators: prospects  
279 and limitations for early warnings of regime shifts. *Philos. Trans. R. Soc. B Biol. Sci.*  
280 **370**, 20130263–20130263. (doi:10.1098/rstb.2013.0263)
- 281 25. Carstensen J, Telford RJ, Birks HJB. 2013 Diatom flickering prior to regime shift.  
282 *Nature* **498**, E11-2. (doi:10.1038/nature12272)
- 283 26. Taranu ZE, Carpenter SR, Frossard V, Jenny J-P, Thomas Z, Vermaire JC, Perga M-E.  
284 2018 Can we detect ecosystem critical transitions and signals of changing resilience  
285 from paleo-ecological records? *Ecosphere* **9**, e02438. (doi:10.1002/ecs2.2438)
- 286 27. Doncaster CP, Chávez VA, Viguier C, Wang R, Zhang E, Dong X, Dearing JA,  
287 Langdon PG, Dyke JG. 2016 Early warning of critical transitions in biodiversity from  
288 compositional disorder. *Ecology* **97**, 3079–3090. (doi:10.1002/ecy.1558)
- 289 28. Wang R *et al.* 2019 Network parameters quantify loss of assemblage structure in  
290 human-impacted lake ecosystems. *Glob. Chang. Biol.* , 1–12. (doi:10.1111/gcb.14776)
- 291 29. Kuiper JJ, van Altena C, de Ruiter PC, van Gerven LPA, Janse JH, Mooij WM. 2015  
292 Food-web stability signals critical transitions in temperate shallow lakes. *Nat.*  
293 *Commun.* **6**, 7727. (doi:10.1038/ncomms8727)
- 294 30. de Ruiter PC, Neutel A-M, Moore JC. 1995 Energetics, Patterns of Interaction  
295 Strengths, and Stability in Real Ecosystems. *Science (80-. )*. **269**, 1257–1260.  
296 (doi:10.1126/science.269.5228.1257)
- 297 31. Lade SJ, Gross T. 2012 Early Warning Signals for Critical Transitions: A Generalized

- 298 Modeling Approach. *PLoS Comput. Biol.* **8**, e1002360.  
299 (doi:10.1371/journal.pcbi.1002360)
- 300 32. Neutel A-M, Heesterbeek JAP, Ruiters PC de. 2002 Stability in Real Food Webs: Weak  
301 Links in Long Loops. *Science* (80-. ). **296**, 1120–1123. (doi:10.1126/science.1068326)
- 302 33. Neutel A-M, Heesterbeek JAP, van de Koppel J, Hoenderboom G, Vos A, Kaldewey C,  
303 Berendse F, de Ruiters PC. 2007 Reconciling complexity with stability in naturally  
304 assembling food webs. *Nature* **449**, 599–602. (doi:10.1038/nature06154)
- 305 34. Francis TB, Wolkovich EM, Scheuerell MD, Katz SL, Holmes EE, Hampton SE. 2014  
306 Shifting Regimes and Changing Interactions in the Lake Washington, U.S.A., Plankton  
307 Community from 1962–1994. *PLoS One* **9**, e110363.  
308 (doi:10.1371/journal.pone.0110363)
- 309 35. Rawcliffe R, Sayer CD, Woodward G, Grey J, Davidson TA, Iwan Jones J. 2010 Back  
310 to the future: Using palaeolimnology to infer long-term changes in shallow lake food  
311 webs. *Freshw. Biol.* **55**, 600–613. (doi:10.1111/j.1365-2427.2009.02280.x)
- 312 36. R Foundation for Statistical Computing. 2016 R (v.3.5.1): A language and environment  
313 for statistical computing.
- 314 37. Faust K, Raes J. 2012 Microbial interactions: From networks to models. *Nat. Rev.*  
315 *Microbiol.* **10**, 538–550. (doi:10.1038/nrmicro2832)
- 316 38. Faust K, Lahti L, Gonze D, de Vos WM, Raes J. 2015 Metagenomics meets time series  
317 analysis: Unraveling microbial community dynamics. *Curr. Opin. Microbiol.* **25**, 56–  
318 66. (doi:10.1016/j.mib.2015.04.004)
- 319 39. Fisher CK, Mehta P. 2014 Identifying Keystone Species in the Human Gut Microbiome  
320 from Metagenomic Timeseries Using Sparse Linear Regression. *PLoS One* **9**, 1–10.  
321 (doi:10.1371/journal.pone.0102451)
- 322 40. Mounier J, Monnet C, Vallaëys T, Arditi R, Sarthou A-S, Helias A, Irlinger F. 2008  
323 Microbial Interactions within a Cheese Microbial Community. *Appl. Environ.*  
324 *Microbiol.* **74**, 172–181. (doi:10.1128/AEM.01338-07)
- 325 41. Power DA, Watson RA, Szathmáry E, Mills R, Powers ST, Doncaster CP, Czapp B.  
326 2015 What can ecosystems learn? Expanding evolutionary ecology with learning  
327 theory. *Biol. Direct* **10**, 69. (doi:10.1186/s13062-015-0094-1)
- 328 42. Watson RA, Szathmáry E. 2016 How Can Evolution Learn? *Trends Ecol. Evol.* **31**,  
329 147–157. (doi:10.1016/j.tree.2015.11.009)
- 330 43. Hopfield JJ. 1982 Neural networks and physical systems with emergent collective  
331 computational abilities. *Proc. Natl. Acad. Sci.* **79**, 2554–2558.  
332 (doi:10.1073/pnas.79.8.2554)
- 333 44. MacKay DJC. 2005 *Information Theory, Inference, and Learning Algorithms*.  
334 Cambridge University Press. (doi:10.1198/jasa.2005.s54)
- 335 45. Rojas R. 1996 *Neural Networks: a Systematic Introduction*. (doi:10.1016/0893-  
336 6080(94)90051-5)

- 337 46. Kröse B, Smagt P van der. 1996 *An Introduction To Neural Networks*.
- 338 47. Janssen ABG, Teurlincx S, Beusen AHW, Huijbregts MAJ, Rost J, Schipper AM,  
339 Seelen LMS, Mooij WM, Janse JH. 2019 PCLake+: A process-based ecological model  
340 to assess the trophic state of stratified and non-stratified freshwater lakes worldwide.  
341 *Ecol. Modell.* **396**, 23–32. (doi:10.1016/j.ecolmodel.2019.01.006)
- 342 48. Wang R, Dearing JA, Langdon PG, Zhang E, Yang X, Dakos V, Scheffer M. 2012  
343 Flickering gives early warning signals of a critical transition to a eutrophic lake state.  
344 *Nature* **492**, 419–22. (doi:10.1038/nature11655)
- 345 49. Hall R, Smol J. 1999 Diatoms as indicators of lake eutrophication. In *The Diatoms:  
346 Applications for the Environmental and Earth Sciences* (eds EF Stoermer, JP Smol), pp.  
347 128–168. Cambridge, UK: Cambridge University Press.
- 348 50. Dixit SS, Smol JP, Kingston JC, Charles DF. 1992 Diatoms: Powerful Indicators of  
349 Environmental Change. *Environ. Sci. Technol.* **26**, 22–33. (doi:10.1021/es00025a002)
- 350 51. Neutel A-M, Thorne MAS. 2016 Linking saturation, stability and sustainability in food  
351 webs with observed equilibrium structure. *Theor. Ecol.* **9**, 73–81. (doi:10.1007/s12080-  
352 015-0270-z)
- 353 52. Suzuki K, Yoshida K, Nakanishi Y, Fukuda S. 2017 An equation-free method reveals  
354 the ecological interaction networks within complex microbial ecosystems. *Methods  
355 Ecol. Evol.* **8**, 1774–1785. (doi:10.1111/2041-210X.12814)
- 356 53. Xiao Y, Angulo MT, Friedman J, Waldor MK, Weiss ST, Liu Y-Y. 2017 Mapping the  
357 ecological networks of microbial communities. *Nat. Commun.* **8**, 2042.  
358 (doi:10.1038/s41467-017-02090-2)
- 359 54. Levine JM, Bascompte J, Adler PB, Allesina S. 2017 Beyond pairwise mechanisms of  
360 species coexistence in complex communities. *Nature* **546**, 56–64.  
361 (doi:10.1038/nature22898)
- 362 55. Cao H-T, Gibson TE, Bashan A, Liu Y-Y. 2016 Inferring human microbial dynamics  
363 from temporal metagenomics data: Pitfalls and lessons. *BioEssays* **39**, 1600188.  
364 (doi:10.1002/bies.201600188)
- 365 56. Gunderson LH. 2000 Ecological Resilience—In Theory and Application. *Annu. Rev.  
366 Ecol. Syst.* **31**, 425–439. (doi:10.1146/annurev.ecolsys.31.1.425)
- 367 57. Kuiper JJ, Kooi BW, Peterson GD, Mooij WM. 2019 Bridging theories for ecosystem  
368 stability through structural sensitivity analysis of ecological models in equilibrium.  
369 *bioRxiv*, 1–23. (doi:10.1101/2019.12.24.887901)

370
